# Supplementary material for: Plant Peroxisome-Targeting Effector MoPtep1 Is Required for the Virulence of Magnaporthe oryzae
Source: MDPI journal article supplement (doi:10.3390/ijms23052515), 2022-02-24
Supplement: s1 [file s1]

**Supplemental Table S1. Primers used in this study**

| Primer name                                             | Sequence (5'-3')                            |
|---------------------------------------------------------|---------------------------------------------|
| <b>Secretory validation vector construction primers</b> |                                             |
| pSUC2-MoPtep1-FL-F                                      | CGGAATTTTAATTAAGAATTCATGCGGTCTATAGCTATCCTGA |
| pSUC2-MoPtep1-FL-R                                      | CACTATAGGGAGAACCTCGAGGCTGGGAGGGGGAACGGCTTG  |
| pSUC2-MoPtep1-NS-F                                      | CGGAATTTTAATTAAGAATTCATGCTTCAGATCCCAGACCTCC |
| <b>Knockout mutant strains construction primers</b>     |                                             |
| HPT-F                                                   | CTTGGCTGGAGCTAGTGGAGGT                      |
| HPT-R                                                   | CCCGGTCGGCATCTACTCTATTC                     |
| HPT-F1                                                  | CGTTGCAAGACCTGCCTGAA                        |
| HPT-R1                                                  | GGATGCCTCCGCTCGAAGTA                        |
| HPT-LBCK                                                | GACAGACGTCGCGGTGAGTT                        |
| HPT-RBCK                                                | TCTGGACCGATGGCTGTGTAG                       |
| MoPtep1-LBCK                                            | ACAGTGCTTGGGAATGGGAC                        |
| MoPtep 1-LB-R                                           | ACCTCCACTAGCTCCAGCCAAGGATGAAATCATGGCTAGATT  |
| MoPtep 1-RBCK                                           | CTCATCCAGCGTCAAGGCCA                        |
| MoPtep 1-RB-F                                           | GAATAGAGTAGATGCCGACCGGGGAAGATTTGGATGCAGCAAC |
| MoPtep 1-LB-F                                           | TCGAGTCGTTCTCCAAGTTT                        |
| MoPtep 1-RB-R                                           | TTCACCACTCCGACAGGTAC                        |
| <b>Knockout mutant strain checking primers</b>          |                                             |
| MoPtep1-F                                               | ATGCGGTCTATAGCTATCCT                        |
| MoPtep1-R                                               | TTAGCTGGGAGGGGGAACGG                        |
| <b>Complementary strains construction primers</b>       |                                             |
| C-MoPtep1-pGTN-F-1                                      | GGGAACAAAAGCTGGGTACCGAGAAGCTCGTGGCCGTGTC    |
| C-MoPtep1-pGTN-R                                        | ATTCTAGAACTAGTGGATCCGCTGGGAGGGGGAACGGCTT    |
| <b>Complementary strains checking primers</b>           |                                             |
| pGTN-cx-F                                               | CATTAGGCAC CCCAGGCTTT                       |
| pGTN-cx-R                                               | TCGTGACCA CCCTGACCTAC                       |
| <b><i>MoPtep1</i> expression primers</b>                |                                             |

|                                                                    |                                           |
|--------------------------------------------------------------------|-------------------------------------------|
| RT-MoPtep1-qF                                                      | TCAGATCCCAGACCTCCTG                       |
| RT-MoPtep1-qR                                                      | CGTGACTGTATGGTTGTTTG                      |
| RT-Mo-Actin-qF                                                     | TGACGTCCGAAAGGATCTGT                      |
| RT-Mo-Actin-qR                                                     | CCTGCTTCGAGATCCACATC                      |
| <b>Subcellular localization and cell death observation primers</b> |                                           |
| MoPtep1-FL-GFP-F                                                   | CGCTCTAGAACTAGTGGATCCATGCGGTCTATAGCTATCCT |
| MoPtep1-FL-GFP-R                                                   | GGGCCCCCCTCGAGGTCGACGCTGGGAGGGGGAACGGCTT  |
| MoPtep1-NS-GFP-F                                                   | CGCTCTAGAACTAGTGGATCCATGCTTCAGATCCCAGACCT |
|                                                                    |                                           |

**Supplemental Table S2. Information on candidate interacting proteins of MoPtep1**

| Name        | Number of amino acids/aa | GenBank accession | Gene description                   | Extend information                                                                                                                                                                                  |
|-------------|--------------------------|-------------------|------------------------------------|-----------------------------------------------------------------------------------------------------------------------------------------------------------------------------------------------------|
| <b>HZ-7</b> | 270                      | XP_015646760.1    | <b>momilactone A synthase-like</b> | Momilactone: An antibacterial compound found in husks of rice, a natural defense substance that has the activity of suppressing the growth of pathogens such as blast fungus.                       |
| <b>IP-4</b> | 177                      | XP_015618577.1    | <b>thaumatin-like protein</b>      | This family is also referred to as pathogenesis-related group 5 (PR5), as many thaumatin-like proteins accumulate in plants in response to infection by a pathogen and possess antifungal activity. |
| <b>HZ-4</b> | 152                      | XP_040380872.1    | <b>plastocyanin, chloroplastic</b> | Plastocyanin; Plastocyanin is a type I copper protein and functions in the electron transfer from PSII to PSI.                                                                                      |

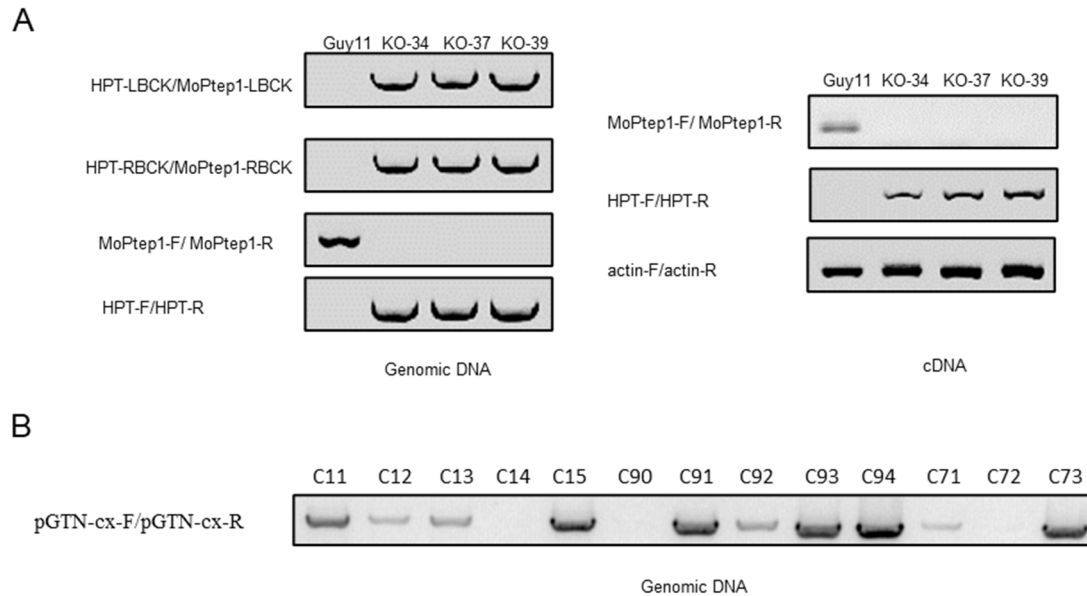

**Supplemental Figure S1:** Identification of the transformants using PCR method. (A) identification of *MoPtep1* ko mutant strains via PCR method. Use the Split-PCR method to knock out the *MoPtep1* gene. Using wild-type strains and transformants' genomic DNA as templates, primers were used to amplify corresponding bands to verify transformants. At the same time, RT-PCR was used for testing. *MoPtep1*-F/*MoPtep1*-R cannot amplify bands were the correct knockout strains. (B) identification of the complementary strain of *MoPtep1* via PCR method. Use vector pGTN to construct *MoPtep1* complementary vector, transform the constructed vector into the protoplasts of *MoPtep1* ko mutant strains, and screen with G418-resistant plates, Use pGTN-cx-F/pGTN-cx-R for PCR screening of the grown transformants, and amplify the corresponding bands of the positive transformants.
